# Supplementary material for: Performance of an Emergency Road Ambulance Service in Bhutan: Response Time, Utilization, and Outcomes
Source: MDPI journal article supplement (doi:10.3390/tropicalmed7060087), 2022-05-31
Supplement: s1 [file s1]

## Health Help Center – Emergency Response Service

### Ambulance Trip Sheet

*(Fill up only for emergency ambulance services and not for inter-facility transfer)*

**Hospital Name:**

**Ambulance registration No:**

**Event Date:**

**Event ID:**

| <b>Ambulance Trip Details</b><br>(To be filled by drivers)                                                                                                                                                                                                                                                                                                                     |  | <b>Call details</b><br>(To be filled by Agents)                                                               |                                                                                                                                      |                               |
|--------------------------------------------------------------------------------------------------------------------------------------------------------------------------------------------------------------------------------------------------------------------------------------------------------------------------------------------------------------------------------|--|---------------------------------------------------------------------------------------------------------------|--------------------------------------------------------------------------------------------------------------------------------------|-------------------------------|
| Ambulance assigned time                                                                                                                                                                                                                                                                                                                                                        |  | Time of call                                                                                                  |                                                                                                                                      |                               |
| Ambulance departure time                                                                                                                                                                                                                                                                                                                                                       |  | Name of caller                                                                                                |                                                                                                                                      |                               |
| Scene arrival time                                                                                                                                                                                                                                                                                                                                                             |  | Call location                                                                                                 |                                                                                                                                      |                               |
| Scene departure time                                                                                                                                                                                                                                                                                                                                                           |  | Caller mobile no                                                                                              |                                                                                                                                      |                               |
| Hospital arrival time                                                                                                                                                                                                                                                                                                                                                          |  | Relation of caller to patient (please circle)                                                                 | Parent/sibling/relative/friend/neighbor/ office colleague /stranger (passerby)                                                       |                               |
| Ambulance release time                                                                                                                                                                                                                                                                                                                                                         |  | <b>Patient demography and clinical details</b><br>(To be filled by Agent, Escort, EMR accompanying ambulance) |                                                                                                                                      |                               |
| Total distance travelled                                                                                                                                                                                                                                                                                                                                                       |  | Patient Name                                                                                                  |                                                                                                                                      |                               |
|                                                                                                                                                                                                                                                                                                                                                                                |  | CID/mobile no.                                                                                                |                                                                                                                                      |                               |
| <b>Ambulance service outcome (tick)</b><br>(To be filled by Driver/Escort/EMR)                                                                                                                                                                                                                                                                                                 |  | Age/Sex                                                                                                       |                                                                                                                                      |                               |
|                                                                                                                                                                                                                                                                                                                                                                                |  | Occupation                                                                                                    |                                                                                                                                      |                               |
|                                                                                                                                                                                                                                                                                                                                                                                |  | Diagnosis/Reason for the call                                                                                 | 1. Medical case<br>2. Surgical case<br>3. Pregnancy related<br>4. Accident trauma<br>5. Road traffic accident<br>6. Others (specify) |                               |
|                                                                                                                                                                                                                                                                                                                                                                                |  |                                                                                                               | Patient status at scene                                                                                                              | Critical/Severe/Moderate/Mild |
| 1. Transported safely and patient alive<br>2. Died before ambulance reached scene<br>3. Died on the way to hospital<br>4. Died on arrival at hospital<br>5. For pregnancy:<br>5.1 Safely reached hospital<br>5.2 Delivered before ambulance reached scene<br>5.3 Delivered in the ambulance<br>6. Ambulance transfer not required/refused after ambulance arrived at the scene |  | Medical care given at scene (briefly)                                                                         |                                                                                                                                      |                               |
|                                                                                                                                                                                                                                                                                                                                                                                |  |                                                                                                               |                                                                                                                                      |                               |
| <b>**If there was an unusual/unexpected delay in ambulance deployment, please mention reasons here:</b>                                                                                                                                                                                                                                                                        |  |                                                                                                               |                                                                                                                                      |                               |

- Every emergency call should fill this form for three months after from start date
- All Ambulance should send the filled form **every week** to 112 through scan copy in WhatsApp group OR email by Monday of the next week

**1. Ambulance driver (Name/Signature):**

**2. EMR/Escort (Name/Signature):**
